# Supplementary material for: Global Metabolic Responses to Salt Stress in Fifteen Species
Source: PubMed Central journal article supplement (PMC4743995; doi:10.1371/journal.pone.0148888), 2016-02-05
Supplement: pone.0148888.s007.pdf [file pone.0148888.s007.pdf]

S1 Table. Characteristics of investigated species.

| genus, species, strain/cell line                          | cell envelope characteristics              | habitat or tissue                        | main known compatible solutes<br>( <i>de novo</i> synthesis induced upon osmotic stress; excluding compounds only taken up from environment) | main isoprenoid quinone <sup>a</sup> | source or reference                       |
|-----------------------------------------------------------|--------------------------------------------|------------------------------------------|----------------------------------------------------------------------------------------------------------------------------------------------|--------------------------------------|-------------------------------------------|
| <i>Homo sapiens</i> HDF                                   | No cell wall                               | Primary neonatal dermal fibroblast cells | sorbitol, inositol, betaine, taurine, glycerophosphocholine [1]                                                                              | Q10 [2]                              | Cell Applications Inc., catalog # 106-05n |
| <i>Homo sapiens</i> MCF7                                  | No cell wall                               | Epithelial breast cancer cell line       | sorbitol, inositol, betaine, taurine, glycerophosphocholine [1]                                                                              | Q10 [2]                              | DSMZ # ACC 115                            |
| <i>Saccharomyces cerevisiae</i> strain Sa-07140           | Glucan, mannan, chitin in cell wall        | Surface of plants and ripening fruit     | glycerol [3], trehalose [4]                                                                                                                  | Q6 [5]                               | DSMZ # 70449                              |
| <i>Schizosaccharomyces pombe</i> strain 975               | Glucan, galactomannan, chitin in cell wall | Surface of plants and ripening fruit     | glycerol [6]                                                                                                                                 | Q10 [5]                              | DSMZ # 70577                              |
| <i>Mycobacterium smegmatis</i> strain GA 735              | Gram-positive, mycolic acids (acid-fast)   | Aquatic environments, human skin         | ectoine, hydroxyectoine [7]                                                                                                                  | K9 [8]                               | DSMZ # 43756                              |
| <i>Corynebacterium glutamicum</i> strain 534              | Gram-positive, mycolic acids               | Soil, water, surface of plants           | proline [9], trehalose [10]                                                                                                                  | K9 [8]                               | DSMZ # 20300                              |
| <i>Bacillus subtilis</i> strain 168                       | Gram-positive                              | Soil                                     | proline [11]                                                                                                                                 | K7 [8]                               | DSMZ # 23778                              |
| <i>Lactobacillus casei</i> strain 03, 7                   | Gram-positive                              | Milk, water                              | none [12]                                                                                                                                    | K <sup>b</sup> [8]                   | DSMZ # 20011                              |
| <i>Agrobacterium tumefaciens</i> strain EX 3.24.2 (L 624) | Gram-negative                              | Soil, plant surface                      | mannosucrose [13]                                                                                                                            | Q10 [8]                              | DSMZ # 30147                              |
| <i>Sinorhizobium meliloti</i> strain 3D0a2                | Gram-negative                              | Soil, plant roots, plant nodules         | glutamate [14], N-acetyl-glutaminylglutamate [15]                                                                                            | Q10 <sup>c</sup> [16]                | DSMZ # 30135                              |
| <i>Paracoccus versutus</i> strain A2                      | Gram-negative                              | Mud, soil                                | <i>no relevant publications found</i>                                                                                                        | Q10 [17]                             | DSMZ # 582                                |
| <i>Rhodobacter sphaeroides</i> strain ATH 2.4.1           | Gram-negative                              | Deep lakes, stagnate waters              | trehalose [18]                                                                                                                               | Q10 [8]                              | DSMZ # 158                                |
| <i>Zymomonas mobilis</i> strain IMG 1655                  | Gram-negative                              | Plant saps, soil                         | sorbitol [19]                                                                                                                                | Q10 [20]                             | DSMZ # 424                                |
| <i>Escherichia coli</i> strain BW25113                    | Gram-negative                              | Gastrointestinal tract of mammals        | trehalose [21], glutamate [22]                                                                                                               | Q8 [8]                               | [23]                                      |
| <i>Pseudomonas fluorescens</i> biovar I (742)             | Gram-negative                              | Soil, water, surface of plants           | glutamate, N-acetyl-glutaminylglutamine amide, trehalose [15]                                                                                | Q9 [8]                               | DSMZ # 50090                              |
| <i>Pseudomonas putida</i> strain 90                       | Gram-negative                              | Soil                                     | N-acetyl-glutaminylglutamine amide, mannitol [24]                                                                                            | Q9 [8]                               | DSMZ # 291                                |

<sup>a</sup>Q, ubiquinone; K, menaquinone. Numbers indicate subunit count of isoprenyl chain

<sup>b</sup>Length of isoprenyl chain unknown

<sup>c</sup>Inferred from quinone composition of two related species of the genus *Sinorhizobium*

## S1 Table References

1. Burg MB. Molecular basis of osmotic regulation. *Am J Physiol.* 1995;268: F983–F996.
2. Nowicka B, Kruk J. Occurrence, biosynthesis and function of isoprenoid quinones. *Biochim Biophys Acta - Bioenerg.* Elsevier B.V.; 2010;1797: 1587–1605. doi:10.1016/j.bbabi.2010.06.007
3. Albertyn J, Hohmann S, Thevelein JM, Prior B a. GPD1, which encodes glycerol-3-phosphate dehydrogenase, is essential for growth under osmotic stress in *Saccharomyces cerevisiae*, and its expression is regulated by the high-osmolarity glycerol response pathway. *Mol Cell Biol.* 1994;14: 4135–44. doi:10.1128/MCB.14.6.4135
4. Houns C-G, Brandt E V., Thevelein J, Hohmann S, Prior BA. Role of trehalose in survival of *Saccharomyces cerevisiae* under osmotic stress. *Microbiology.* 1998;144: 671–680. doi:10.1099/00221287-144-3-671
5. Kawamukai M. Biosynthesis, Bioproduction and Novel Roles of Ubiquinone. *J Biosci Bioeng.* 2002;94: 511–517. Available: <http://www.sciencedirect.com/science/article/pii/S1389172302801888>
6. Aiba H, Yamada H, Ohmiya R, Mizuno T. The osmo-inducible *gpd1+* gene is a target of the signaling pathway involving Wis1 MAP-kinase kinase in fission yeast. *FEBS Lett.* 1995;376: 199–201. doi:10.1016/0014-5793(95)01277-4
7. Ofer N, Wishkautzan M, Meijler M, Wang Y, Speer A, Niederweis M, et al. Ectoine Biosynthesis in *Mycobacterium smegmatis*. *Appl Environ Microbiol.* 2012;78: 7483–7486. doi:10.1128/AEM.01318-12
8. Collins MD, Jones D. Distribution of Isoprenoid Quinone Structural Types in Bacteria and Their Taxonomic Implications. *Microbiol Mol Biol Rev.* 1981;42: 316–354.
9. Guillouet S, Engasser JM. Growth of *Corynebacterium glutamicum* in glucose-limited continuous cultures under high osmotic pressure. Influence of growth rate on the intracellular accumulation of proline, glutamate and trehalose. *Appl Microbiol Biotechnol.* 1995;44: 496–500. doi:10.1007/BF00169950
10. Wolf A, Krämer R, Morbach S. Three pathways for trehalose metabolism in *Corynebacterium glutamicum* ATCC13032 and their significance in response to osmotic stress. *Mol Microbiol.* 2003;49: 1119–1134. doi:10.1046/j.1365-2958.2003.03625.x
11. Brill J, Hoffmann T, Bleisteiner M, Bremer E. Osmotically Controlled Synthesis of the Compatible Solute Proline Is Critical for Cellular Defense of *Bacillus subtilis* against High Osmolarity. *J Bacteriol.* 2011;193: 5335–5346. doi:10.1128/JB.05490-11
12. Poolman B, Glaasker E. Regulation of compatible solute accumulation in bacteria. *Mol Microbiol.* 1998;29: 397–407. doi:10.1046/j.1365-2958.1998.00875.x
13. Fernandez-Aunión C, Hamouda T Ben, Iglesias-Guerra F, Argandoña M, Reina-Bueno M, Nieto JJ, et al. Biosynthesis of compatible solutes in rhizobial strains isolated from *Phaseolus vulgaris* nodules in Tunisian fields. *BMC Microbiol.* 2010;10: 192. doi:10.1186/1471-2180-10-192
14. Botsford JL, Lewis T a. Osmoregulation in *Rhizobium meliloti*: Production of glutamic acid in response to osmotic stress. *Appl Environ Microbiol.* 1990;56: 488–494.
15. Smith LT, Smith GM. An osmoregulated dipeptide in stressed *Rhizobium meliloti*. *J Bacteriol.* 1989;171: 4714–7. Available: <http://www.pubmedcentral.nih.gov/articlerender.fcgi?artid=210271&tool=pmcentrez&rendertype=abstract>
16. Ogasawara M, Suzuki T, Mutoh I, Annapurna K, Arora NK, Nishimura Y, et al. *Sinorhizobium indiaense* sp. nov. and *Sinorhizobium abri* sp. nov. Isolated from Tropical Legumes, *Sesbania rostrata* and *Abrus precatorius*, Respectively. *Symbiosis.* 2003;34: 53–68. doi:10.1017/CBO9781107415324.004
17. Lipski A, Klätte S, Bendinger B, Altendorf K. Differentiation of gram-negative, nonfermentative bacteria isolated from biofilters on the basis of fatty acid composition, quinone system, and physiological reaction profiles. *Appl Environ Microbiol.* 1992;58: 2053–2065.
18. Tsuzuki M, Moskvina O V., Kuribayashi M, Sato K, Retamal S, Abo M, et al. Salt Stress-Induced Changes in the Transcriptome, Compatible Solutes, and Membrane Lipids in the Facultatively Phototrophic Bacterium *Rhodobacter sphaeroides*. *Appl Environ Microbiol.* 2011;77: 7551–7559. doi:10.1128/AEM.05463-11
19. Loos H, Krämer R, Sahm H, Sprenger G a. Sorbitol promotes growth of *Zymomonas mobilis* in environments with high concentrations of sugar: evidence for a physiological function of glucose-fructose oxidoreductase in osmoprotection. *J Bacteriol.* 1994;176: 7688–7693.
20. Strohdreier M, Neuss B, Bringer-Meyer S, Sahm H. Electron transport chain of *Zymomonas mobilis*. *Arch Microbiol.* 1990;154: 536–543.
21. Giaever HM, Styrvoid OB, Kaasen I, Strom AR. Biochemical and genetic characterization of Osmoregulatory Trehalose Synthesis in *Escherichia coli*. *J Bacteriol.* 1988;170: 2841–2849.
22. Record MT, Courtenay ES, Cayley DS, Guttman HJ. Responses of *E. coli* to osmotic stress: Large changes in amounts of cytoplasmic solutes and water. *Trends Biochem Sci.* 1998;23: 143–148. doi:10.1016/S0968-0004(98)01196-7
23. Yamamoto N, Nakahigashi K, Nakamichi T, Yoshino M, Takai Y, Touda Y, et al. Update on the Keio collection of *Escherichia coli* single-gene deletion mutants. *Mol Syst Biol.* 2009;5: 335. doi:10.1038/msb.2009.92
24. Kets EP, Galinski E a, de Wit M, de Bont J a, Heipieper HJ. Mannitol, a novel bacterial compatible solute in *Pseudomonas putida* S12. *J Bacteriol.* 1996;178: 6665–70. Available: <http://www.pubmedcentral.nih.gov/articlerender.fcgi?artid=178559&tool=pmcentrez&rendertype=abstract>
