# Supplementary material for: Global Metabolic Responses to Salt Stress in Fifteen Species
Source: PubMed Central journal article supplement (PMC4743995; doi:10.1371/journal.pone.0148888), 2016-02-05
Supplement: pone.0148888.s008.pdf [file pone.0148888.s008.pdf]

S2 Table. Salt tolerance of investigated species.

| <b>species/cell line</b>          | <b>IC<sub>10</sub></b><br>mean ± std.dev.<br>(mM NaCl) | <b>IC<sub>25</sub></b><br>mean ± std.dev.<br>(mM NaCl) | <b>IC<sub>50</sub></b><br>mean ± std.dev.<br>(mM NaCl) |
|-----------------------------------|--------------------------------------------------------|--------------------------------------------------------|--------------------------------------------------------|
| <i>Homo sapiens</i> HDF           | 89 ± 0                                                 | 103 ± 0                                                | 120 ± 0                                                |
| <i>Homo sapiens</i> MCF7          | 60 ± 0                                                 | 80 ± 0                                                 | 105 ± 0                                                |
| <i>Escherichia coli</i>           | 534 ± 30                                               | 732 ± 30                                               | 995 ± 30                                               |
| <i>Pseudomonas putida</i>         | 543 ± 4                                                | 693 ± 4                                                | 883 ± 4                                                |
| <i>Pseudomonas fluorescens</i>    | 277 ± 5                                                | 397 ± 5                                                | 566 ± 4                                                |
| <i>Rhodobacter sphaeroides</i>    | 119 ± 44                                               | 184 ± 51                                               | 290 ± 50                                               |
| <i>Paracoccus versutus</i>        | 460 ± 14                                               | 602 ± 12                                               | 785 ± 9                                                |
| <i>Sinorhizobium meliloti</i>     | 110 ± 46                                               | 189 ± 65                                               | 323 ± 88                                               |
| <i>Agrobacterium tumefaciens</i>  | 149 ± 34                                               | 211 ± 27                                               | 308 ± 7                                                |
| <i>Zymomonas mobilis</i>          | 280 ± 53                                               | 628 ± 14                                               | 1535 ± 115                                             |
| <i>Saccharomyces cerevisiae</i>   | 249 ± 58                                               | 632 ± 203                                              | 1503 ± 349                                             |
| <i>Schizosaccharomyces pombe</i>  | 30 ± 14                                                | 74 ± 23                                                | 180 ± 25                                               |
| <i>Lactobacillus casei</i>        | 714 ± 41                                               | 1050 ± 30                                              | 1475 ± 12                                              |
| <i>Bacillus subtilis</i>          | 415 ± 50                                               | 557 ± 30                                               | 746 ± 7                                                |
| <i>Corynebacterium glutamicum</i> | 743 ± 0                                                | 866 ± 4                                                | 1010 ± 9                                               |
| <i>Mycobacterium smegmatis</i>    | 145 ± 25                                               | 335 ± 0                                                | 781 ± 85                                               |
